# Supplementary material
Source: Springer Nature journal article supplement (https://www.springermedizin.de/resource/supplementary/13031_2011_84_MOESM1_ESM.pdf/9645064)
Supplement: MOESM1 [file 9645064]



A Venn diagram consisting of three overlapping circles. The top circle is labeled "Love & self-confidence". The bottom-left circle is labeled "Rights & self-respect". The bottom-right circle is labeled "Solidarity & self-esteem". The circles overlap in the center and at the intersections between pairs of circles.

Love & self-  
confidence

Rights & self-  
respect

Solidarity &  
self-esteem
